# 1 Tradeoffs in bacterial physiology determine the efficiency of antibiotic killing

2

3

4 Anat Bren\*, David S. Glass\*, Yael Korem Kohanim, Avi Mayo, Uri Alon

5 Department of Molecular Cell Biology, Weizmann Institute of Science, Rehovot, Israel

6

## 7 Abstract

8 Antibiotics can kill or stop the growth of bacteria, and their effectiveness depends on many factors. It  
9 is important to understand the relation between bacterial physiology, the environment and antibiotic  
10 action. While many of the mechanistic details of antibiotic action are known, the connection between  
11 death rate and bacterial physiology is poorly understood. Death rate in antibiotics has often been  
12 shown to rise linearly with growth rate; however, it remains unclear how environmental factors, in  
13 concert with whole-cell physiological properties, affect bactericidal activity. To address this, we  
14 developed a high-throughput assay to precisely measure antibiotic-mediated bacterial death. We  
15 found that death rate is linear in growth rate, but the slope depends on environmental conditions.  
16 Specifically, stressors lower the death rate compared to a non-stressed environment with the same  
17 growth rate. To understand the role of stress, we developed a mathematical model of bacterial death  
18 based on resource allocation that takes into account a newly defined stress-response sector; we  
19 identify this sector using RNA-seq. Our model accurately predicts the death rate and minimal  
20 inhibitory concentration of antibiotics across a wide range of conditions, including a previously  
21 unknown increase in the stress response and protection from death at very low levels of cAMP. The  
22 present death-growth model suggests conditions that may improve antibiotic efficacy.

## 23 Introduction

24 The first antibiotic was discovered over 100 years ago <sup>1</sup>. Since then, many antibiotics that  
25 either kill the bacteria (bactericidal) or primarily inhibit their growth (bacteriostatic) have been  
26 discovered <sup>2</sup>. The direct interactions and proximal mechanisms of action have been elucidated for  
27 many antibiotics. However, the connection between the molecular mechanism of action and the  
28 physiological state of the bacterium (e.g., growth rate, proteomic profile) that ultimately leads to

29 death remains poorly understood<sup>2-4</sup>. Understanding how bacteria deal with antibiotics is particularly  
30 relevant due to increasing issues of resistance mutations<sup>5-7</sup>.

31 Another concern in antibiotic treatment is tolerance, a natural ability to survive prolonged  
32 treatment<sup>8</sup>. Tolerance is not accompanied by a change in the minimal inhibitory concentration (MIC)  
33<sup>8</sup> and is known to depend on the bacterial growth environment<sup>8-10</sup>. Because of the clinical importance,  
34 many studies have approached antibiotic efficacy from the perspective of outcome (i.e., bacterial  
35 death) rather than the physiological state of the bacterium (see<sup>2</sup> for a recent review). In this paper,  
36 we focus on the connection between death rate, MIC and the physiological state of the bacteria.

37 Previous studies found linear relationships between growth rate or metabolic state and death  
38 rate due either to bactericidal antibiotic<sup>11-17</sup> or to starvation<sup>18</sup>. In contrast to these simple linear  
39 relations, combinatorial treatments show greater complexity ( see<sup>19</sup> for a recent review). For instance,  
40 bacteriostatic antibiotics protect against death due to bactericidal antibiotics<sup>20</sup> and anti-ribosomal  
41 antibiotics protect against anti-DNA antibiotic<sup>21</sup>. In addition, starvation and other stressful conditions  
42 were found to protect bacteria from antibiotics<sup>9,10,22-25</sup>. It is thus reasonable to expect that the  
43 connection between growth rate and death rate is more complex than a simple linear function of  
44 growth rate and may be dependent on the environment and the physiological state of the cell.

45 Unlike the death rate, the growth rate has been extensively studied in terms of physiology,  
46 revealing simple growth laws<sup>26-30</sup>. An early example of a growth law is the linear increase of growth  
47 rate with ribosomal content<sup>27</sup> (the basis of an “R sector” in later terminology<sup>30</sup>). This simple growth  
48 law has proven impressively capable of predicting bacterial growth rates across a wide range of  
49 environmental conditions, despite the thousands of underlying molecular reactions<sup>26,27,30</sup>. More  
50 detailed yet still coarse-grained models extended the growth laws to predict growth rate as a function  
51 of multiple internal proteomic sectors, each representing large groups of genes with similar behavior  
52 under corresponding resource limitations<sup>31-34</sup>. For example, the “C sector” represents genes which  
53 are upregulated under carbon limitation<sup>31,35,36</sup>.

54 One attempt to relate resource allocation to death proposed that investment in maintenance  
55 prolongs survival during starvation<sup>18</sup>. We hypothesized that a generalized resource-allocation model,  
56 which takes into account tradeoffs between sectors due to limited cell resources, could connect  
57 environmental conditions, internal bacterial physiology and antibiotic killing rates. To build and test  
58 such a model requires accurate measurement of death rates in many conditions.

59           In this paper, we developed a high-throughput method to measure bactericidal death rates  
60 in a variety of conditions. We found that the death rate does not depend on growth rate alone, but  
61 also on the details of the environment. Stressful environments protect against bactericidal killing  
62 relative to non-stressed environments with the same growth rate. We hypothesized that stressful  
63 environments activate a cellular physiological program that helps bacteria to deal with damage  
64 imposed by the antibiotic treatment<sup>37</sup>. To test this, we developed a mathematical model that can  
65 quantitatively recapitulate death rates from given environmental conditions, based on tradeoffs in  
66 the allocation of resources to growth-related and stress-related proteomic sectors. Moreover, the  
67 model could accurately predict MIC, which we measured in an independent manner and which rose  
68 with decreased death rate only under stressful conditions – an effect we term *hardiness*. We  
69 confirmed the existence of such a stress sector using RNA sequencing and quantitatively validated the  
70 model predictions of C (carbon), S (stress), and R (ribosomal) sector sizes in various conditions. By  
71 directly manipulating the sector sizes via cAMP, we found a surprising decrease in death as well as an  
72 increase in MIC at low cAMP, which is quantitatively predicted by the model. Finally, we use our  
73 results to discuss the clinical relevance and suggest treatment conditions that may improve antibiotic  
74 killing of bacteria.

## 75 **Results**

### 76 **High throughput assay of bacterial death rates**

77           Bacterial death rates are classically measured via the colony-forming unit (CFU) assay. This  
78 assay estimates the number of viable bacteria remaining after various times in a damaging treatment  
79 by counting colonies that grow after plating on permissive agar media. This method is labor-intensive  
80 and limited in throughput. High-throughput measurements of decreasing optical density (OD)<sup>12</sup> or of  
81 minimal duration of killing (MDK)<sup>38</sup> are either limited to specific antibiotics that disrupt cell integrity  
82 (e.g., ampicillin) or yield limited time-course information. Single-cell tracking of death via microfluidics  
83<sup>39</sup> is not easily scaled to measurement in many conditions. Overall, there is a lack of robust, high-  
84 throughput methods to measure death curves.

85           Here, we developed such an automated, high-throughput assay to measure death rates in 96-  
86 well plates on a robotic system (details in Fig. 1 and Methods). In short, we measured the surviving  
87 fraction of cells as a function of antibiotic challenge duration. The robotic system enabled us to run a  
88 reverse time course with antibiotic introduced into exponentially growing cultures at a consistent OD  
89 (Figs. 1A, S1). Following the start-growth-time method of Hazan, *et al.*, we estimated surviving cell

90 numbers by measuring the time  $\tau$  for a treated culture to reach a certain OD threshold in permissive  
91 (minimal glucose) media (Fig. 1B)<sup>40</sup>. Fewer live cells growing exponentially will take longer to reach  
92 the threshold and thus represent lower percent survival, which we quantified by comparison to delays  
93  $\tau$  in untreated, diluted cultures (Fig. 1C). From percent survival in a range of antibiotic treatment  
94 durations, we obtained a survival curve and fit it to a Weibull survival function coupled to exponential  
95 growth (see Methods). Note that in some conditions we observed an initial increase in the number of  
96 viable bacteria, reflecting that bacteria at first grew faster than they died (Figs. S2,S3), as has been  
97 observed previously<sup>12</sup>. We defined death rate as  $1/t_{90}$ , the inverse of time to reach 10% survival of  
98 the initial population (Figs. 1D, S3, Methods).

99 We validated this approach by comparison to the CFU method in various conditions and found  
100 very good agreement (Fig. S4, Methods). We also tested the sensitivity of the method to treatment  
101 duration and found that the calibration between recovery time  $\tau$  and survival does not depend on  
102 time in antibiotic (Fig. S5). We conclude that the high throughput assay provides an accurate measure  
103 of killing in the present conditions.

104 Overall, the protocol provided throughput of 4-8 survival curves in a two-day experiment (see  
105 Figs. S2 and S15 for all death curves obtained in this study).

### 106 **Death rate depends on both growth rate and physiological stress**

107 Using this assay, we explored the relation between growth and death rates of *E. coli* NCM3722  
108 under various physiological conditions (Figs. S2, S3). As a challenge, we used 10 $\mu$ g/ml of the  
109 bactericidal antibiotic nalidixic acid, which interferes with DNA gyrase<sup>41</sup>. We used multiple growth  
110 conditions and evaluated the growth rate in each in the absence of the antibiotic challenge. First, we  
111 studied the effect of various carbon sources in a minimal growth medium. We found, in agreement  
112 with previous studies, that the lower the growth rate, the lower the death rate. Death rate in glucose,  
113 which supported the fastest growth, was the highest; death rate was lowest in the poorest carbon  
114 sources, galactose and mannose (blue dots, Fig. 2)

115 We next used glucose as a carbon source and reduced the growth rate by applying stress conditions,  
116 namely conditions that limit growth not by nutrients but through other environmental parameters<sup>34</sup>.  
117 Specifically, we used NaCl at high osmolality or the DNA-damaging antibiotic trimethoprim (TMP),  
118 which is bacteriostatic in minimal media<sup>42,43</sup>.

119 We found that the growth-death relation was steeper in stressors than in the carbon sources. In other  
120 words, we death rate depends on the environment, with stressful conditions providing dose-  
121 dependent protection (orange and green dots, Fig. 2). Further increase in stress levels (400mM and  
122 500mM NaCl) resulted in cells growing faster than they died, which we quantified as a negative death  
123 rate (Fig S6, Methods).

124 Thus, conditions with a similar growth rate may result in significantly different death rates. For  
125 example, the death rate on mannose or galactose was ~2-fold higher than the death rate reached by  
126 300mM NaCl or 0.2µg/ml TMP, with much steeper survival curves (Fig. 2 inset). Protection from death  
127 was also found when using ethanol and tetracycline as stressors (Fig. S7). This finding was not  
128 exclusive to Nalidixic acid. We measured death rate by phosphomycin, an antibiotic from a different  
129 class (a membrane synthesis inhibitor<sup>44</sup>) and similarly found that death rate on mannose was higher  
130 than on glucose plus 300mM NaCl or 0.2µg/ml TMP (Fig S8). We also tested thye aminoglycoside  
131 antibiotic streptomycin<sup>45</sup> and found protection from death by 300mM NaCl, but not by 0.2µg/ml TMP  
132 (Fig. S8).

133 We conclude that death rate is not solely a function of growth rate. Antibiotic causes a higher death  
134 rate when applied to bacteria growing on a poor carbon source than when it is applied to bacteria  
135 with the same growth rate growing on a rich carbon source supplemented with stressors.

### 136 **A resource allocation model can explain the observed growth-death data**

137 We hypothesized that a resource-allocation model including a stress-response sector can explain the  
138 observed growth and death rates. We begin with the dependence of death rate on growth rate in  
139 different carbon sources, which we call the 'sugar line' (Fig. 3A, blue line). On the sugar line, the well-  
140 established resource allocation theory predicts that as more resources are dedicated to carbon  
141 catabolism (C sector), fewer resources are dedicated to building ribosomes (R sector), resulting in a  
142 correspondingly lower growth rate<sup>31,35,36</sup>. One may assume that under these conditions the death rate  
143 increases in direct correlation to growth rate due to increased production of damage in line with  
144 previous descriptions<sup>11,15</sup> (e.g., nalidixic acid affects DNA gyrase, which introduces DNA breaks during  
145 replication<sup>46</sup>).

146 In contrast, when growth rate is varied via stressor concentration using glucose as a carbon  
147 source, we expect the C sector to remain constant. We base this expectation on the fact that the  
148 carbon source remains unchanged and the stresses imposed are unrelated to metabolic constraints.  
149 We predict that with stressors present, resources are redirected to a newly defined stress-response

150 sector (S sector) at the expense of the R sector. This increase in stress-related genes can provide  
151 protection against antibiotic damage while decreasing growth rate, resulting in a ‘stress line’ (Fig. 3A,  
152 green and orange lines). We assume that under the conditions we studied, changing resources are  
153 divided strictly into the R, C and S sectors, while other sectors remain unchanged. This hypothesis  
154 predicts that conditions in which both carbon source and stress level change will yield growth and  
155 death rates that reside between the sugar and stress lines. Indeed, we find that combinations of  
156 glycerol+TMP and glycerol+NaCl lie between these lines, as does acetate, which is a poor carbon  
157 source known to induce a stress response<sup>47,48</sup> (Fig S9).

158 Based on the above hypotheses, we developed a mathematical resource-allocation model,  
159 summarized by the following equations. We use growth on glucose as an anchor point and define the  
160 change of the sectors in a given condition as  $\Delta C$ ,  $\Delta S$  and  $\Delta R$ . Since the sum of all sectors is constant  
161 ( $C+S+R=1$ ), their total change must equal zero<sup>30</sup>:

162 Eq (1)  $\Delta C + \Delta S + \Delta R = 0$ ,

163 The growth rate  $\mu$  depends linearly on the R sector as described by the well-established growth law  
164<sup>27,30</sup>  $\mu = aR - b$ , and thus the change of growth rate relative to glucose obeys:

165 Eq (2)  $\Delta\mu = a\Delta R$ ,

166 where  $a$  is the ribosomal growth efficiency.

167 The new aspect of the model is an equation for the death rate. Death rate  $\rho$  increases with  
168 damage, which is proportional to growth rate and reduced by the S sector, leading to the proposed  
169 death law:

170 Eq (3)  $\Delta\rho = \alpha\Delta\mu - \beta\Delta S$ .

171 Here  $\Delta\rho$  is death rate minus death rate on glucose,  $\alpha$  is the decrease in death rate per decrease in  
172 growth rate and  $\beta$  is the death protection efficiency per unit increase in the S sector. We assume that  
173 on the sugar line, which lacks stressors, S remains constant so that  $\Delta S = 0$ , while on the stress line C  
174 remains constant so that  $\Delta C = 0$  and thus  $\Delta S = -\frac{1}{a}\Delta\mu$ . Fitting Equations 1-3 to the growth-death  
175 measurements (Fig. 3A, Table S1, Methods) provides an excellent fit (adj.  $R^2=0.986$ ) with two non-  
176 dimensionalized free parameters,  $\hat{\alpha} = \alpha \frac{\mu_G}{\rho_G}$  and  $\hat{\beta} = \beta \frac{\mu_G}{a\rho_G}$  (Methods). The sugar line slope  
177 provides  $\hat{\alpha} = 0.72 \pm 0.11$ . The stress line shows that protection by NaCl ( $\hat{\beta} = 1.41 \pm 0.14$ ) is greater  
178 than for TMP ( $\hat{\beta} = 0.88 \pm 0.13$ ).

## 179 **The resource allocation model accurately predicts MIC as a function of growth rate**

180 We next considered the three major concepts of bacterial survival in antibiotics: resistance,  
181 tolerance and persistence, as recently defined by Brauner *et al*<sup>8</sup>. Two are not relevant to this study –  
182 persistence relates to a very small subpopulation that is not killed, whereas our experiments focus on  
183 the whole-population level. Resistance is due to genetic changes, which do not occur in our short-  
184 term experiments. The remaining concept, tolerance, is defined as the ability of microorganisms to  
185 survive antibiotic treatment for a longer time (reduced death rate) without a change in MIC<sup>8</sup>. We  
186 therefore set out to measure the MIC in order to test whether the reduced killing in our conditions is  
187 due to tolerance.

188 We quantified MIC by measuring growth curves in a range of nalidixic acid concentrations,  
189 identifying the MIC as the lowest antibiotic concentration that prevents growth (Methods, Fig. S10).  
190 We found that MIC does not vary with different sugars (Fig. 3B, blue points), corresponding to  
191 tolerance. However, MIC increased with stressors in a dose-dependent manner (Fig. 3B, green and  
192 orange points) with negative correlation to death rate (Fig. S11). This requires a new concept to  
193 describe reduced killing accompanied by increased MIC, which we term *hardiness*.

194 Indeed, both hardiness and tolerance are predicted quantitatively by our death model.  
195 Mathematically, we characterize MIC by  $\rho = 0$ , corresponding to a flat survival curve. Thus, we expect  
196 that conditions lying on the horizontal axis in Fig. 3A to have a MIC of 10 $\mu$ g/ml nalidixic acid (the  
197 concentration used). Assuming that the growth-dependent damage  $\alpha$  and death rate on glucose  $\rho_G$   
198 increase linearly with antibiotic concentration, we derive a relation between MIC and growth rate for  
199 all growth conditions (Methods). Specifically, MIC remains constant for the sugar line but increases  
200 according to a Michaelis-Menten-like function of growth rate. Thus, the model predicts tolerance for  
201 sugars and hardiness for stressors. Without any additional free parameters, the model prediction  
202 provides an excellent fit to the MIC data (adj.  $R^2=0.982$ , Fig. 3B).

## 203 **Gene-expression measurements support the prediction of a sizable stress sector**

204 A basic assumption of the proposed model is a sizable S sector, whose fraction of cellular resources  
205 at high stress is significant enough to lead to a decrease in the R sector and a corresponding decrease  
206 in growth rate.

207 To examine the size and composition of the S sector, we performed RNA-Seq analysis on *E.*  
208 *coli* NCM3722 cultures grown in various carbon sources or in glucose with increasing concentrations



209 of NaCl or TMP (Methods). We grouped genes into clusters using a Gaussian mixture model and then  
210 grouped the clusters by increasing, decreasing, or insignificant Spearman correlation between  
211 summed expression and growth rate (Methods). Because noise leading to insignificant correlations  
212 can hide trends in summed expression, we use the following definitions for the R, C, and S sectors.  
213 The R sector included all clusters correlated positively with growth rate in at least one of the three  
214 sets of conditions (NaCl, TMP, or sugars) and not anti-correlated with growth rate in any condition.  
215 This included the classic ribosomal R sector genes, as well as all other non-ribosomal genes that rise  
216 with growth rate<sup>49,50</sup>. The S sector included clusters anticorrelated with growth rate in NaCl or TMP  
217 but not in poor carbon (784 genes). The remaining clusters were defined as the C sector (1053 genes),  
218 which included clusters increasing in only poor carbon or in both poor carbon and NaCl. These sectors  
219 show expected overlap with previously reported sectors measured using proteomics<sup>31</sup> (Fig. S12).

220 Enriched GO terms in these clusters (Fig. 3C, Methods) match the expectation that C is  
221 catabolism-related, R is ribosomal and growth-related, and S genes are stress-related. The inferred S  
222 sector also included anabolic genes, presumably related to requirements for production of protective  
223 components. For example, arginine biosynthesis is a known requirement for pH tolerance<sup>51</sup>. Because  
224 of their known role in antibiotic tolerance<sup>52</sup>, we measured the contribution of efflux pump expression  
225 to the observed protection from death. We found that the total expression of efflux pumps is very  
226 low and does not follow the expected expression trends of the model (Fig S13).

227 In accordance with the model assumptions, we fit the RNA-Seq sector-size data for sugars,  
228 NaCl, and TMP to linear functions of growth rate, requiring zero slope where sectors are expected to  
229 remain constant (S on sugars and C on stressors). We found an excellent fit in all three cases (Figs. 3D-  
230 F, Table S2; adj.  $R^2=0.999$  for sugars,  $R^2=0.998$  for NaCl, and  $R^2=0.999$  for TMP). Note that because  
231 sectors were defined using Spearman correlation, the linear dependence is not an artifact of the  
232 definitions. Notably, the R-sector slope is higher for sugars than for stressors. This difference may be  
233 due to a lower translation rate for R-sector genes under stress<sup>53</sup>, so that more ribosomal mRNA is  
234 required to provide a consistent amount of ribosomal protein. The 'classic' ribosomal R sector, which  
235 relates strictly to ribosomal content, can be measured by total RNA, which is predominantly ribosomal  
236 RNA. Total RNA shows the expected growth law: a linear dependence on growth rate that is similar in  
237 poor carbon sources and in stressors (Figs. 3F inset, S14, adj.  $R^2=0.93$ )

### 238 **Experimental modulation of the C sector provides a rigorous test of the model**

239 In Fig.2 we modulated the C sector by changing the carbon source. Another way to change the C sector



240 and to further test the model is by modulating the activity of the master C-sector regulator CRP<sup>54</sup>.  
241 This can be done by changing the concentration of the signaling molecule cAMP that activates  
242 CRP<sup>32,35,36</sup>. We thus measured growth and death rates of strain U486 (MG1655 $\Delta$ cyaA $\Delta$ cpdA), which  
243 cannot produce or degrade cAMP, in a range of exogenously supplied cAMP concentrations<sup>32,35,36</sup>.

244 As was shown earlier<sup>32,36</sup>, growth rate is non-monotonic as a function of cAMP, yielding equi-  
245 growth rate conditions achieved by different cAMP levels (Fig S15). The optimum growth rate lies  
246 between 0.2-0.3mM cAMP. Death rate measurements yielded dependency on growth that did not  
247 collapse onto a single line, with low cAMP protecting more strongly from death compared to high  
248 cAMP at similar growth rates (Figs. 4A, S16, S17). Thus, as for the sugars and stressors, death rate as  
249 a function of cAMP is not determined solely by growth rate. Encouraged by the linear fits for sugars  
250 and stressors, we assumed that S remains constant for high cAMP (> $\sim$ 0.3mM cAMP) while C remains  
251 constant for low cAMP (< $\sim$  0.2mM cAMP). Strikingly, despite the nonlinear growth curve as a function  
252 of cAMP, this same model provides an excellent fit (adj.  $R^2=0.941$ ) with just two slope parameters  
253 (Table S3).

254 We also tested the MIC in these conditions, and again find different relationships between  
255 MIC and growth rate in the low and high regimes of cAMP levels (Fig. 4B). For cAMP> $\sim$ 0.3mM MIC  
256 was constant with growth rate, while for cAMP < $\sim$ 0.2mM, it increased with decreased growth rate.  
257 Using one additional free parameter to describe the anchor point between the two regimes fit the  
258 data very well (adj.  $R^2=0.991$ , Methods). Plotting MIC versus death rate highlights the difference  
259 between tolerance and hardiness: high cAMP shows tolerance while low cAMP shows hardiness (Fig.  
260 4C).

261 The origin of the differential behavior in low and high cAMP regimes is revealing. The present  
262 model indicates that at cAMP levels above the optimal growth rate, the C sector rises with cAMP<sup>32,36</sup>  
263 at the expense of the R sector without a change in the S sector, similar to the sugar line. Death drops  
264 with cAMP, as does growth. At cAMP levels below the optimal growth rate, the C sector changes only  
265 mildly<sup>32</sup>, and the S sector rises with decreasing cAMP at the expense of the R sector, with a protective  
266 effect on death. Thus, ultra-low cAMP levels, achieved physiologically only in unusual conditions<sup>55</sup>,  
267 are interpreted by the cells as a stress signal, leading to a reduced death rate and an increased MIC.

268

269 **Discussion**

270 We developed a high-throughput assay for measuring bacterial death curves. Using this assay, we  
271 determined the relation between the growth rate in a given condition and the death rate in a  
272 subsequent antibiotic challenge. Death rate depended both on growth rate and growth condition.  
273 Stressful conditions protected from death when compared to no-stress conditions of equal growth  
274 rate. Stress resulted in lower death rate and increased MIC, a phenomenon that lies outside the  
275 available definitions of antibiotic response, which we termed hardiness. The quantitative relation  
276 between growth and death is captured by a resource allocation model, in which death is increased by  
277 growth-related damage and reduced by a protective stress-response sector. We identified this stress  
278 sector using RNA-Seq measurements. In line with the model, protection from death was also gained  
279 when manipulating the C-sector to low levels via exogenous cAMP.

280 Most of the work on bacterial growth laws has focused on growth rate, not on death rate.  
281 Growth laws are explained by resource allocation models that focus on the relation between  
282 proteome distribution and growth rate. These models define sectors by an increased expression of a  
283 group of genes needed to cope with a certain limitation at the expense of ribosomes<sup>30-32</sup>. Here, we  
284 find that resource allocation-based theory can also predict death rate when we introduce a newly  
285 defined stress-response sector.

286 These findings emphasize the need to define what conditions are considered stressful for  
287 bacteria. Stress was recently defined as a condition that limits growth not by nutrients but through  
288 other environmental parameters<sup>34</sup>. Such conditions will upregulate a proteomic response that is not  
289 directly involved in biomass production (such as ribosomes, catabolic genes). One of the stressors we  
290 used is the bacteriostatic antibiotic TMP. Our results thus provide an explanation for the known  
291 antagonistic effect of bacteriostatic antibiotics on bactericidal action<sup>56</sup>: bacteriostatic antibiotics in  
292 general may raise a stress response and thereby reduce death by bactericidal antibiotics. An additional  
293 way to impose stress is starvation, known to provide tolerance and persistence to antibiotics while  
294 upregulating stress-gene expression<sup>9,10,23,57</sup>. It will be interesting to measure antibiotic-mediated  
295 death rates and the size of the S sector under starvation. Likewise, it will be interesting to measure  
296 the effect of nitrogen limitation on various carbon sources, given that various combinations of carbon  
297 and nitrogen sources can lead to either low or high cAMP levels<sup>55</sup>. It may also be illuminating to  
298 explore the connection of the proposed coarse-grained model of stress to molecular regulators of  
299 stress response such as ppGpp<sup>58</sup>.

300 In addition to the connection between growth conditions and death rate, the present findings

301 highlight the importance of considering growth conditions when determining the MIC for a given  
302 antibiotic. An elevated MIC is usually considered a form of resistance, such as that caused by  
303 mutations. A raised MIC can also result from stressful growth conditions without mutations<sup>23,59</sup>, in a  
304 manner captured quantitatively by the present resource allocation model. Our proposed  
305 differentiation between tolerance and hardiness captures the range of behaviors that describe both  
306 MIC and death rate.

307 Clinically, our work suggests that in the variety of conditions in the body, bacteria may be  
308 tolerant and hardy to antibiotics compared to laboratory conditions. For example, some of the stress  
309 placed on bacteria by the immune system may counterintuitively inhibit the killing efficacy of  
310 antibiotics. This suggests possible targets for treatments. For instance, provision of inhibitors of  
311 alternative sigma factors together with antibiotics may inhibit stress sector expression and enhance  
312 antibiotic efficacy. We anticipate that quantitative understanding of the death-growth tradeoff in  
313 bacteria and its relation to stress may thus have clinical applications, and more generally may advance  
314 our understanding of tradeoffs in bacterial physiology.

315

316 **References**

- 317 1. Fleming, A. & Wright, A. E. On a remarkable bacteriolytic element found in tissues and  
318 secretions. *Proceedings of the Royal Society of London. Series B, Containing Papers of a*  
319 *Biological Character* **93**, 306–317 (1922).
- 320 2. Baquero, F. & Levin, B. R. Proximate and ultimate causes of the bactericidal action of  
321 antibiotics. *Nat Rev Microbiol* **19**, 123–132 (2021).
- 322 3. Kohanski, M. A., Dwyer, D. J. & Collins, J. J. How antibiotics kill bacteria: from targets  
323 to networks. *Nature Reviews Microbiology* **8**, 423–435 (2010).
- 324 4. Stokes, J. M., Lopatkin, A. J., Lobritz, M. A. & Collins, J. J. Bacterial Metabolism and  
325 Antibiotic Efficacy. *Cell Metabolism* (2019) doi:10.1016/j.cmet.2019.06.009.
- 326 5. Murray, C. J. *et al.* Global burden of bacterial antimicrobial resistance in 2019: a  
327 systematic analysis. *The Lancet* S0140673621027240 (2022) doi:10.1016/S0140-  
328 6736(21)02724-0.
- 329 6. Bhattarai, K., Bastola, R. & Baral, B. Antibiotic drug discovery: Challenges and  
330 perspectives in the light of emerging antibiotic resistance. in *Advances in Genetics* vol.  
331 105 229–292 (Elsevier, 2020).
- 332 7. Courvalin, P. Why is antibiotic resistance a deadly emerging disease? *Clinical*  
333 *Microbiology and Infection* **22**, 405–407 (2016).
- 334 8. Brauner, A., Fridman, O., Gefen, O. & Balaban, N. Q. Distinguishing between resistance,  
335 tolerance and persistence to antibiotic treatment. *Nature Reviews Microbiology* **14**, 320–  
336 330 (2016).
- 337 9. Fung, D. K. C., Chan, E. W. C., Chin, M. L. & Chan, R. C. Y. Delineation of a Bacterial  
338 Starvation Stress Response Network Which Can Mediate Antibiotic Tolerance  
339 Development. *Antimicrobial Agents and Chemotherapy* **54**, 1082–1093 (2010).

- 340 10. Nguyen, D. *et al.* Active Starvation Responses Mediate Antibiotic Tolerance in Biofilms  
341 and Nutrient-Limited Bacteria. *Science* **334**, 982–986 (2011).
- 342 11. Tuomanen, E., Cozens, R., Tosch, W., Zak, O. & Tomasz, A. The rate of killing of  
343 *Escherichia coli* by  $\beta$ -lactam antibiotics is strictly proportional to the rate of bacterial  
344 growth. *Microbiology* **132**, 1297–1304 (1986).
- 345 12. Lee, A. J. *et al.* Robust, linear correlations between growth rates and  $\beta$ -lactam-mediated  
346 lysis rates. *PNAS* **115**, 4069–4074 (2018).
- 347 13. Greulich, P., Scott, M., Evans, M. R. & Allen, R. J. Growth-dependent bacterial  
348 susceptibility to ribosome-targeting antibiotics. *Molecular Systems Biology* **11**, 796  
349 (2015).
- 350 14. Lopatkin, A. J. *et al.* Bacterial metabolic state more accurately predicts antibiotic  
351 lethality than growth rate. *Nature Microbiology* **4**, 2109–2117 (2019).
- 352 15. Eng, R. H., Padberg, F. T., Smith, S. M., Tan, E. N. & Cherubin, C. E. Bactericidal  
353 effects of antibiotics on slowly growing and nongrowing bacteria. *Antimicrob Agents*  
354 *Chemother* **35**, 1824–1828 (1991).
- 355 16. Smirnova, G. V. & Oktyabrsky, O. N. Relationship between *Escherichia coli* growth rate  
356 and bacterial susceptibility to ciprofloxacin. *FEMS Microbiol Lett* **365**, (2018).
- 357 17. Levin, B. R. *et al.* A Numbers Game: Ribosome Densities, Bacterial Growth, and  
358 Antibiotic-Mediated Stasis and Death. *mBio* **8**, e02253-16 (2017).
- 359 18. Biselli, E., Schink, S. J. & Gerland, U. Slower growth of *Escherichia coli* leads to longer  
360 survival in carbon starvation due to a decrease in the maintenance rate. *Mol Syst Biol* **16**,  
361 (2020).

- 362 19. Roemhild, R., Bollenbach, T. & Andersson, D. I. The physiology and genetics of  
363 bacterial responses to antibiotic combinations. *Nat Rev Microbiol* (2022)  
364 doi:10.1038/s41579-022-00700-5.
- 365 20. Lobritz, M. A. *et al.* Antibiotic efficacy is linked to bacterial cellular respiration.  
366 *Proceedings of the National Academy of Sciences* **112**, 8173–8180 (2015).
- 367 21. Bollenbach, T., Quan, S., Chait, R. & Kishony, R. Nonoptimal microbial response to  
368 antibiotics underlies suppressive drug interactions. *Cell* **139**, 707–18 (2009).
- 369 22. Hobbs, J. K. & Boraston, A. B. (p)ppGpp and the Stringent Response: An Emerging  
370 Threat to Antibiotic Therapy. *ACS Infectious Diseases* **5**, 1505–1517 (2019).
- 371 23. Poole, K. Stress responses as determinants of antimicrobial resistance in Gram-negative  
372 bacteria. *Trends in Microbiology* **20**, 227–234 (2012).
- 373 24. Belenky, P. *et al.* Bactericidal Antibiotics Induce Toxic Metabolic Perturbations that  
374 Lead to Cellular Damage. *Cell Reports* **13**, 968–980 (2015).
- 375 25. Beizman-Magen, Y., Grinberg, M., Orevi, T. & Kashtan, N. Wet-dry cycles protect  
376 surface-colonizing bacteria from major antibiotic classes. *ISME J* **16**, 91–100 (2022).
- 377 26. Schaechter, M., MaalØe, O. & Kjeldgaard, N. O. Dependency on Medium and  
378 Temperature of Cell Size and Chemical Composition during Balanced Growth of  
379 *Salmonella typhimurium*. *J Gen Microbiol* **19**, 592–606 (1958).
- 380 27. Ecker, R. E. & Schaechter, M. Ribosome content and the rate of growth of *Salmonella*  
381 *typhimurium*. *Biochimica et Biophysica Acta (BBA) - Specialized Section on Nucleic*  
382 *Acids and Related Subjects* **76**, 275–279 (1963).
- 383 28. Zaslaver, A. *et al.* Invariant distribution of promoter activities in *Escherichia coli*. *PLoS*  
384 *Comput Biol* **5**, e1000545 (2009).

- 385 29. Maaløe, O. & Kjeldgaard, N. O. *Control of Macromolecular Synthesis; a Study of DNA,*  
386 *RNA, and Protein Synthesis in Bacteria.* (W.A Benjamin INC, 1966).
- 387 30. Scott, M., Gunderson, C. W., Mateescu, E. M., Zhang, Z. & Hwa, T. Interdependence of  
388 Cell Growth and Gene Expression: Origins and Consequences. *Science* **330**, 1099–1102  
389 (2010).
- 390 31. Hui, S. *et al.* Quantitative proteomic analysis reveals a simple strategy of global resource  
391 allocation in bacteria. *Molecular Systems Biology* **11**, (2015).
- 392 32. Kochanowski, K. *et al.* Global coordination of metabolic pathways in *Escherichia coli* by  
393 active and passive regulation. *Mol Syst Biol* **17**, (2021).
- 394 33. Mori, M. *et al.* From coarse to fine: the absolute *Escherichia coli* proteome under diverse  
395 growth conditions. *Mol Syst Biol* **17**, (2021).
- 396 34. Scott, M. & Hwa, T. Shaping bacterial gene expression by physiological and proteome  
397 allocation constraints. *Nat Rev Microbiol* (2022) doi:10.1038/s41579-022-00818-6.
- 398 35. You, C. *et al.* Coordination of bacterial proteome with metabolism by cyclic AMP  
399 signalling. *Nature* **500**, 301–6 (2013).
- 400 36. Towbin, B. D. *et al.* Optimality and sub-optimality in a bacterial growth law. *Nat*  
401 *Commun* **8**, 14123 (2017).
- 402 37. Palmer, A. C., Chait, R. & Kishony, R. Nonoptimal Gene Expression Creates Latent  
403 Potential for Antibiotic Resistance. *Molecular Biology and Evolution* (2018)  
404 doi:10.1093/molbev/msy163.
- 405 38. Brauner, A. & Balaban, N. Q. Quantitative biology of survival under antibiotic  
406 treatments. *Current Opinion in Microbiology* **64**, 139–145 (2021).



- 407 39. Yang, Y. *et al.* Temporal scaling of aging as an adaptive strategy of *Escherichia coli*. *Sci.*  
408 *Adv.* **5**, eaaw2069 (2019).
- 409 40. Hazan, R., Que, Y.-A., Maura, D. & Rahme, L. G. A method for high throughput  
410 determination of viable bacteria cell counts in 96-well plates. *BMC Microbiology* **12**, 259  
411 (2012).
- 412 41. Sugino, A., Peebles, C. L., Kreuzer, K. N. & Cozzarelli, N. R. Mechanism of action of  
413 nalidixic acid: Purification of *Escherichia coli* nalA gene product and its relationship to  
414 DNA gyrase and a novel nicking-closing enzyme. *Proceedings of the National Academy*  
415 *of Sciences* **74**, 4767–4771 (1977).
- 416 42. Brogden, R. N., Carmine, A. A., Heel, R. C., Speight, T. M. & Avery, G. S.  
417 Trimethoprim: A Review of its Antibacterial Activity, Pharmacokinetics and Therapeutic  
418 Use in Urinary Tract Infections. *Drugs* **23**, 405–430 (1982).
- 419 43. Kwon, Y. K., Higgins, M. B. & Rabinowitz, J. D. Antifolate-Induced Depletion of  
420 Intracellular Glycine and Purines Inhibits Thymineless Death in *E. coli*. *ACS Chem. Biol.*  
421 **5**, 787–795 (2010).
- 422 44. Patel, S. S., Balfour, J. A. & Bryson, H. M. Fosfomycin Tromethamine: A Review of its  
423 Antibacterial Activity, Pharmacokinetic Properties and Therapeutic Efficacy as a Single-  
424 Dose Oral Treatment for Acute Uncomplicated Lower Urinary Tract Infections. *Drugs*  
425 **53**, 637–656 (1997).
- 426 45. Davis, B. D. Mechanism of bactericidal action of aminoglycosides. *Microbiol Rev* **51**,  
427 341–350 (1987).

- 428 46. Gellert, M., Mizuuchi, K., O’Dea, M. H. & Nash, H. A. DNA gyrase: an enzyme that  
429 introduces superhelical turns into DNA. *Proceedings of the National Academy of*  
430 *Sciences* **73**, 3872–3876 (1976).
- 431 47. Arnold, C. N., McElhanon, J., Lee, A., Leonhart, R. & Siegele, D. A. Global Analysis of  
432 *Escherichia coli* Gene Expression during the Acetate-Induced Acid Tolerance Response.  
433 *J Bacteriol* **183**, 2178–2186 (2001).
- 434 48. Kirkpatrick, C. *et al.* Acetate and Formate Stress: Opposite Responses in the Proteome of  
435 *Escherichia coli*. *J Bacteriol* **183**, 6466–6477 (2001).
- 436 49. Keren, L. *et al.* Promoters maintain their relative activity levels under different growth  
437 conditions. *Molecular systems biology* **9**, 701 (2013).
- 438 50. Gerosa, L., Kochanowski, K., Heinemann, M. & Sauer, U. Dissecting specific and global  
439 transcriptional regulation of bacterial gene expression. *Molecular systems biology* **9**, 658  
440 (2013).
- 441 51. Richard, H. & Foster, J. W. *Escherichia coli* Glutamate- and Arginine-Dependent Acid  
442 Resistance Systems Increase Internal pH and Reverse Transmembrane Potential. *J*  
443 *Bacteriol* **186**, 6032–6041 (2004).
- 444 52. Zhu, M. & Dai, X. High Salt Cross-Protects *Escherichia coli* from Antibiotic Treatment  
445 through Increasing Efflux Pump Expression. *mSphere* **3**, (2018).
- 446 53. Dai, X. *et al.* Slowdown of Translational Elongation in *Escherichia coli* under  
447 Hyperosmotic Stress. *mBio* **9**, (2018).
- 448 54. Fic, E. *et al.* cAMP Receptor Protein from *Escherichia coli* as a Model of Signal  
449 Transduction in Proteins – A Review. *Microb Physiol* **17**, 1–11 (2009).

- 450 55. Bren, A. *et al.* Glucose becomes one of the worst carbon sources for E.coli on poor  
451 nitrogen sources due to suboptimal levels of cAMP. *Sci Rep* **6**, 24834 (2016).
- 452 56. Ocampo, P. S. *et al.* Antagonism between Bacteriostatic and Bactericidal Antibiotics Is  
453 Prevalent. *Antimicrobial Agents and Chemotherapy* **58**, 4573–4582 (2014).
- 454 57. Radzikowski, J. L. *et al.* Bacterial persistence is an active  $\sigma^S$  stress response to metabolic  
455 flux limitation. *Mol Syst Biol* **12**, 882 (2016).
- 456 58. Magnusson, L. U., Farewell, A. & Nyström, T. ppGpp: a global regulator in Escherichia  
457 coli. *Trends in Microbiology* **13**, 236–242 (2005).
- 458 59. Andersson, D. I. *et al.* Antibiotic resistance: turning evolutionary principles into clinical  
459 reality. *FEMS Microbiology Reviews* **44**, 171–188 (2020).
- 460 60. Zaslaver, A. *et al.* A comprehensive library of fluorescent transcriptional reporters for  
461 Escherichia coli. *Nature Methods* **3**, 623–628 (2006).
- 462 61. Scrucca, L., Fop, M., Murphy, T., Brendan & Raftery, A., E. mclust 5: Clustering,  
463 Classification and Density Estimation Using Gaussian Finite Mixture Models. *The R*  
464 *Journal* **8**, 289 (2016).
- 465 62. Love, M. I., Huber, W. & Anders, S. Moderated estimation of fold change and dispersion  
466 for RNA-seq data with DESeq2. *Genome Biol* **15**, 550 (2014).
- 467 63. Mi, H. *et al.* PANTHER version 16: a revised family classification, tree-based  
468 classification tool, enhancer regions and extensive API. *Nucleic Acids Research* **49**,  
469 D394–D403 (2021).
- 470  
471

472 **Figures and figure legends.**

473

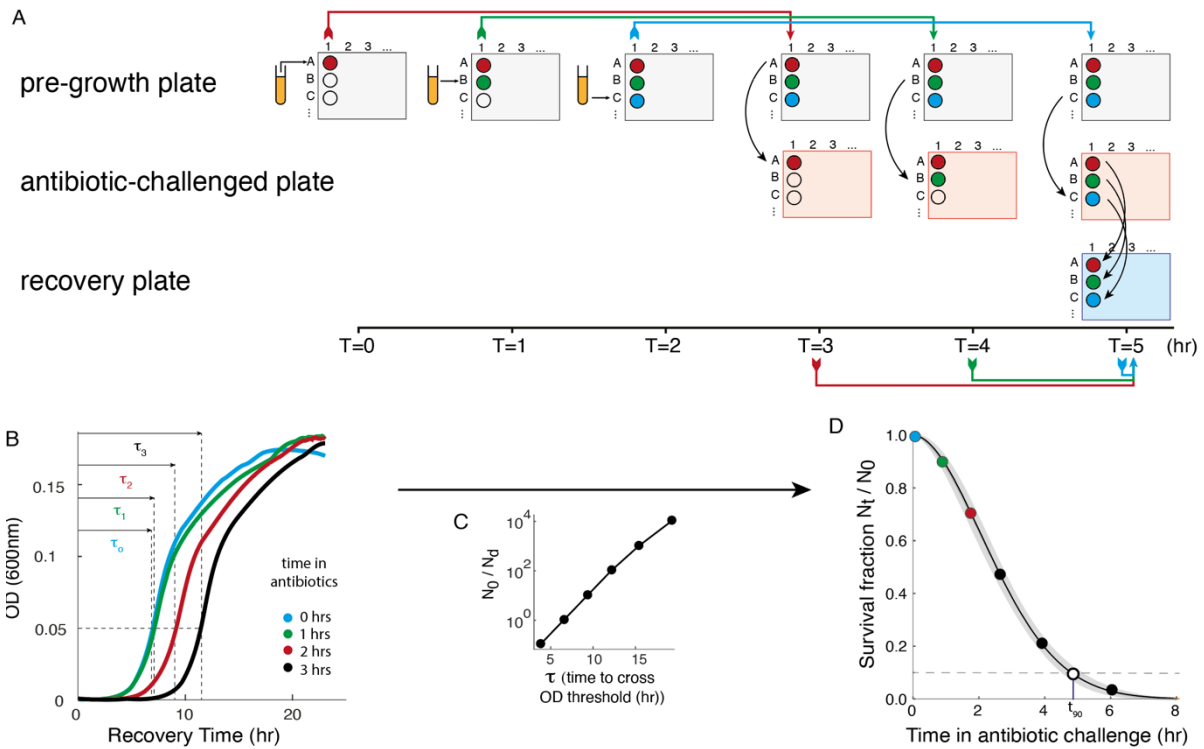

474

475

476 **Fig 1. Death rate measurement protocol.** For simplicity, we illustrate here the process for 3 time  
 477 points (additional time points indicated in black) for one replicate of a single growth condition, with  
 478 1-hr resolution. **A.** Scheme of the robotic process. (i) *Pre-growth*: in this stage bacteria are inoculated  
 479 each hour in successive wells. (ii) *Antibiotic challenge*: after 3 hours of pre-growth, each exponentially  
 480 growing culture is transferred to antibiotics. (iii) *Recovery*: all cultures are moved to antibiotic-free  
 481 recovery medium at the same time, resulting in cultures that have been treated with antibiotics for  
 482 various time durations. (i.e., wells in different colors have the same pre-growth conditions but spend  
 483 different times in antibiotic) **B.** OD curves of cultures recovering from the antibiotic treatment. For  
 484 each curve, we define the delay time  $\tau$  to cross the OD=0.05 threshold indicated by the horizontal  
 485 dashed line. Cultures that spent more time in antibiotics have larger  $\tau$ . **C.** A standard curve obtained  
 486 from the  $\tau$  values of non-treated cultures with a range of dilutions ( $N_0$  = initial concentration,  $N_d$  =  
 487 diluted concentration) gives the relation between delay and relative number of bacteria. **D.** Surviving  
 488 fraction as a function of time in the antibiotic challenge is calculated based on the measured  $\tau$  and the

489 standard curve ( $N_0$  = concentration of live cells at time 0,  $N_t$  = concentration of live cells at time t).  
490 We fit this data with a Weibull survival function (plus growth for initially growing cultured, Fig. S2-S3,  
491 main text) and defined death rate as  $1/t_{90}$ , where  $t_{90}$  is the time for the function to drop to 10%.  
492

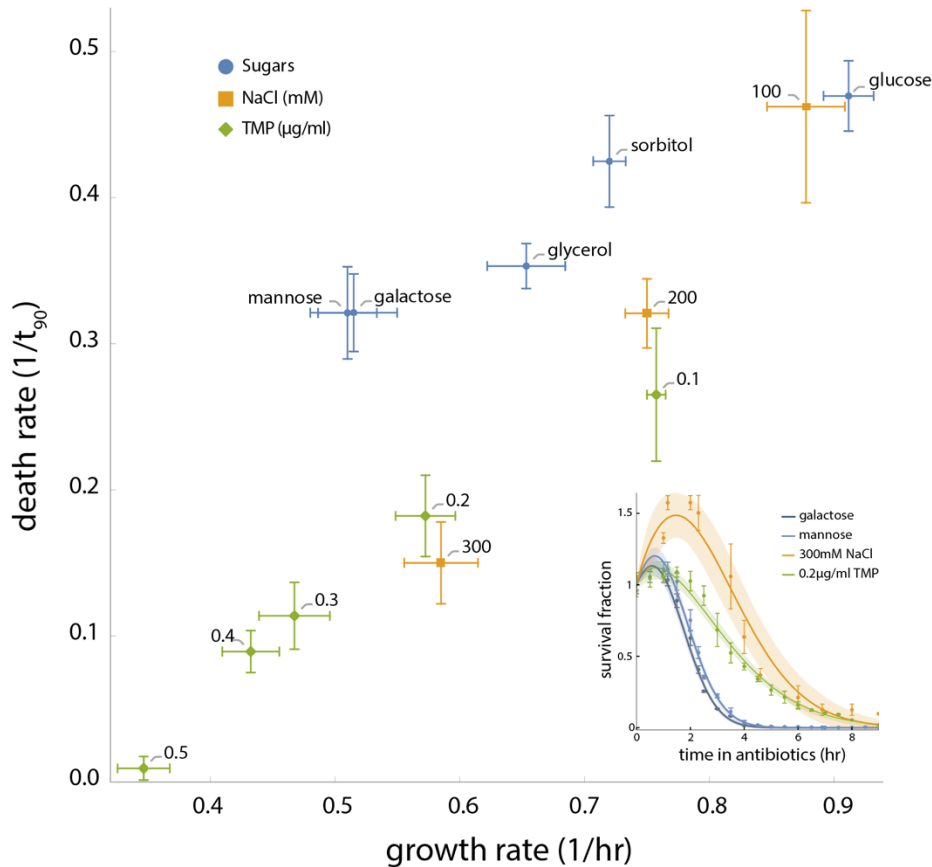

493

494

495 **Fig 2. Antibiotic-mediated death depends on both growth rate and growth condition.** The  
496 dependency of death rate on growth rate for NCM3722 strain (measured separately without nalidixic  
497 acid) under stress is steeper than under non-stressful conditions. Death rate upon treatment with 10  
498  $\mu\text{g/ml}$  nalidixic acid as a function of growth rate is shown for 13 different conditions (M9 + glucose as  
499 the reference point, M9 + 4 additional carbon sources and M9 + glucose + varying concentrations of  
500 NaCl or TMP). Each rate is determined based on at least 3 biological repeats. Error bars are standard  
501 error. **Inset.** At similar growth rates (0.52-0.59  $\text{hr}^{-1}$ ), lower death rates in stress conditions (NaCl and  
502 TMP) derive from wider survival curves than present in non-stressed conditions (mannose and  
503 galactose). Shown are averaged survival curves (see also Fig. S3), with shaded areas the 95%

504 confidence interval of the fit (Methods).

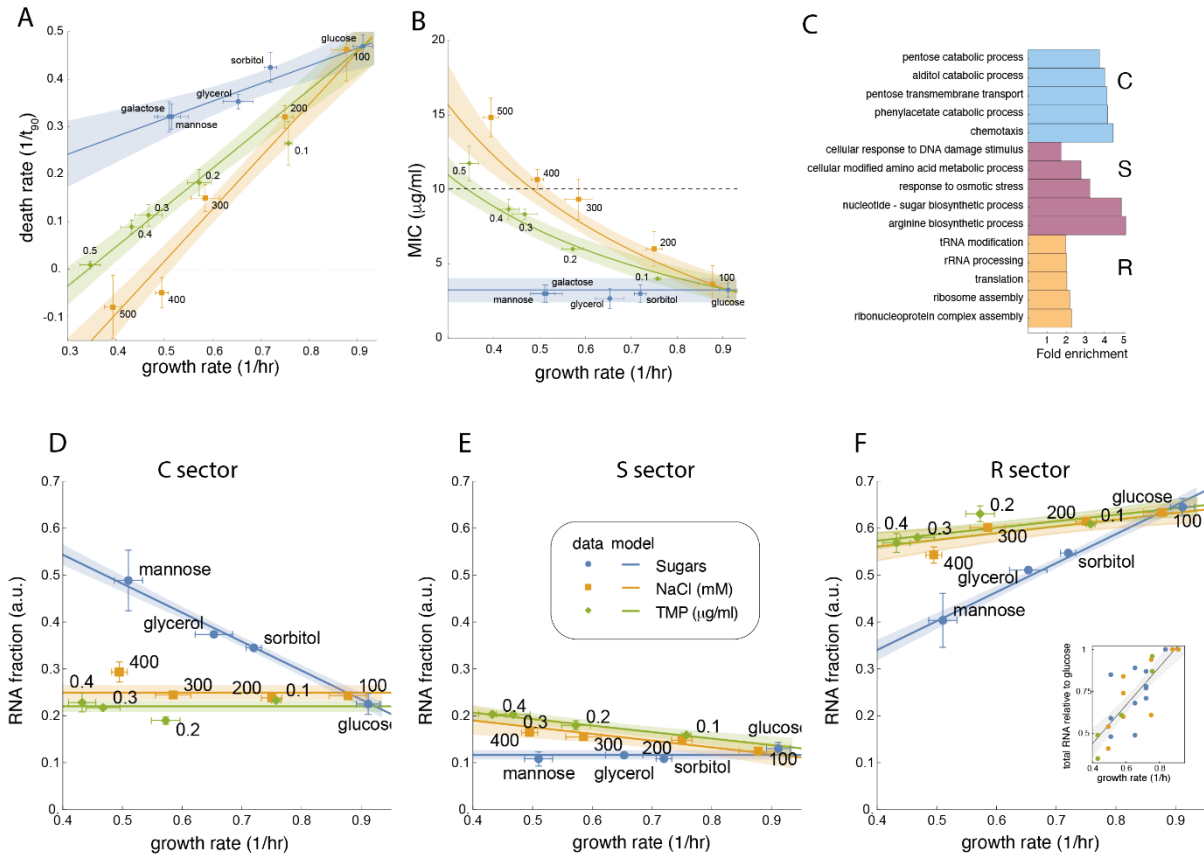

505

506 **Fig. 3 A resource-allocation model quantitatively matches growth, death, MIC, and sector-size**

507 **measurements. A.** Fitting Eqs 1-3 (Methods) to growth and death measurements from Fig. 2 produces

508 a tight fit, with S constant for sugar data and C constant for stressors. **B.** The model predicts MIC data

509 with no additional free parameters if the direct effect of growth on death is assumed to increase

510 linearly with nalidixic acid concentration. **C.** Gene ontology (GO) terms for the determined C, S, and R

511 sectors match expected behaviors of catabolism, stress, and growth, respectively. The stress sector

512 contains anabolic processes, presumably due to indirect stress-response needs. Displayed terms are

513 5 terms with lowest false discovery rate that are not child-terms of other significant terms. **D-F.** Total

514 mRNA fraction of the measured sectors show that C is relatively constant with increasing stress while

515 S is relatively constant regardless of sugar quality. R increases with growth rate, but at different slopes

516 for sugars and stressors. **F inset.** Total RNA increases with growth rate at the same slope for both

517 sugars and stressors. Shaded regions in all panels other than **B** are 90% confidence intervals on the

518 fitted parameters (Methods). For **B** the error bands are propagated from the fits in **A** (Methods).

519 Legend for **A, B, E-F** as in **E**.

520

521

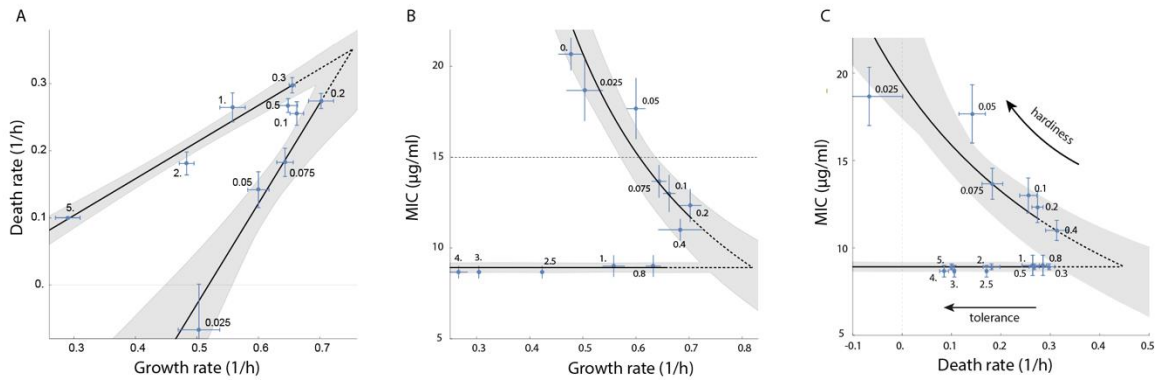

522

523 **Fig. 4. The proposed resource allocation model quantitatively captures death rate and MIC as a**

524 **function of cAMP in a  $\Delta cyaA \Delta cpdA$  strain. (A)** Death rate as a function of growth rate upon

525 treatment with 15 $\mu\text{g/ml}$  nalidixic acid fit with two slope parameters. **(B)** MIC as a function of growth

526 rate fit with one anchor parameter. Labels are cAMP concentration in mM. Shaded regions

527 represent 90% confidence intervals on the fit. Dashed portions of fits are extrapolations into the

528 unmodeled transition region between low and high cAMP regimes. Dashed fit lines represent

529 extrapolations into the unmodeled transition region between low- and high-cAMP regimes.

530 Horizontal dashed line in **B** is the concentration of nalidixic acid used in **A**. **(C)** Plotting MIC vs death

531 rate for emphasizes the difference between tolerance and hardness. High cAMP concentrations

532 show tolerance (decreased death rate without a change in MIC), while low cAMP concentrations

533 show hardness (decreased death with a corresponding increase in MIC). For data in which only MIC

534 or death rate was measured in **A** and **B**, the other was imputed from the fit. Note that the maximum

535 growth rate in this strain differs from the wild type used in Figs 2-3.

536



537 **Methods**

538 Strains. Experiments in this study were carried out using either NCM3722 strain (CGSC #12355) or  
539 MG1655 strain (CGSC #6300) and its derivatives MG1655 $\Delta$ cyaA/ $\Delta$ cpdA (U486<sup>36</sup>). All strains were  
540 transformed with a kanamycin resistant, low copy promoterless plasmid (U66<sup>60</sup>) to acquire resistance  
541 and reduce contaminations during the long death experiments.

542 Growth rate and MIC measurements. Cells were grown overnight in M9 minimal medium (42mM  
543 Na<sub>2</sub>HPO<sub>4</sub>, 22mM KH<sub>2</sub>PO<sub>4</sub>, 8.5mM NaCl, 18.5mM NH<sub>4</sub>Cl, 2mM MgSO<sub>4</sub>, 0.1mM CaCl) containing 11mM  
544 glucose, 0.05% casamino acids and 50 $\mu$ g/ml kanamycin at 37°C and diluted 1:300 into the designated  
545 Media (all based on M9 with different carbon source, different concentration of NaCl etc.)

546 For growth rate measurements cultures were distributed using a robotic liquid handler (FreedomEvo,  
547 Tecan) in 96-well plates (150 $\mu$ l per well in at least 6 wells). Wells were covered with 100  $\mu$ l of mineral  
548 oil (Sigma) to prevent evaporation and transferred into an automated incubator. Cells were grown in  
549 an automated incubator with shaking (6 hz) at 37°C for about 20 hours. Every 6-10 minutes the plate  
550 was transferred by a robotic arm into a multi-well fluorimeter (Infinite M200Pro, Tecan) that reads  
551 the bacteria optical density (OD, 600nm). For MIC measurements the setup was very similar with the  
552 following changes: cultures were pre-grown in tubes for 3-4 hrs and then distributed to wells  
553 containing different concentrations of Nalidixic acid.

554 Growth rate was calculated as the temporal derivative of the natural logarithm of the OD curves,  $\mu =$   
555  $d\ln(OD)/dt$ . Exponential growth rate is the mean over a region of at least 2 generations with a nearly  
556 constant growth rate.

557

558 MIC was determined as the minimal Nalidixic acid concentration which led to an OD decline (in  
559 NCM3722 strain, Fig. S6A) or a non-increasing OD curve (MG1655 strain, Fig. S6B).

560 Death rate measurements. A scheme of the experimental setup (carried out automatically in a robotic  
561 system (FreedomEvo, Tecan)) is shown in Fig 1 for one growth condition and a short experiment  
562 duration. In reality, in each experiment we measured 6-8 growth conditions and up to 16 hrs of  
563 antibiotic challenge.

564 This experimental setup contains 3 stages:

565 1. *Pre-growth stage:* This stage was carried out in a 96 well plate containing 200 $\mu$ l media (3-4

566 different growth conditions in a plate) +50 $\mu$ l mineral oil. As shown in Fig.1 an overnight  
567 culture (M9+11mM glucose+0.05% casamino acids+50 $\mu$ g/ml kanamycin) was diluted (1:300)  
568 into the growth plate. The culture was diluted to the first well of each condition (wells A1, A4,  
569 A7, A10 for a 4-conditions plate) and incubated in an automated incubator with shaking (6 hz)  
570 at 37°C for a time period (0.5-1 hr) which defines the experiment time resolution. Plates were  
571 transferred by the robotic arm into a multi-well fluorimeter (Infinite M200Pro, Tecan) that  
572 reads OD (600nm), followed by bacteria transfer from the overnight culture to the successive  
573 wells. This stage was repeated till the first well reached exponential phase (3-8 hrs, OD 0.02-  
574 0.04).

575 2. *Antibiotic-challenge stage*: This stage was carried out in a 96 well plate containing 170 $\mu$ l  
576 media (same growth conditions as in the pre-growth plate+ Nalidixic acid) +50 $\mu$ l mineral oil).  
577 The first well of each condition of the pre-growth plate is diluted (1:7) into the antibiotic-  
578 challenged plate, in parallel inoculation of the ON culture to the pre-growth plate continues  
579 as well. Both plates are incubated with shaking (6 hz) at 37°C for the same time used in the  
580 pre-growth stage. Plates were transferred into a multi-well fluorimeter for OD measurements,  
581 followed by bacteria transfer to successive wells. For experiments with time resolution of 1  
582 hr this stage was routinely repeated 16 times. For experiments with time resolution of 0.5 hr  
583 more repeats were carried out.

584 3. *Recovery stage*: In the last stage we adopted the protocol of Hazan *et. al.*<sup>40</sup> for viable cell  
585 determination based on the incubation time to cross a certain OD threshold. After the last  
586 transfer from the pre-growth plate to the challenged plate we immediately transferred the  
587 challenged plate to ice. Bacteria treated for different times as well as a non-treated culture  
588 were diluted 1:100 into 1 ml of recovery medium (M9+11mM glucose+50 $\mu$ g/ml kanamycin)  
589 in a deep 96-well plate. Non-treated cultures were also serially diluted in order to obtain a  
590 standard curve. Using the robotic system, we transferred each diluted culture to 6 wells of a  
591 96-well plate (150 $\mu$ l per well). Wells were covered with 100  $\mu$ l of mineral oil and transferred  
592 into an automated incubator. Cells were grown in an automated incubator with shaking (6 hz)  
593 at 37°C for about 20 hours. Every 10 minutes the plate was transferred by a robotic arm into  
594 a multi-well fluorimeter (Infinite M200Pro, Tecan) that reads the bacteria optical density (OD,  
595 600nm). Setting the OD threshold to 0.05, ( $\sim 2 \cdot \text{background OD}$ ), we extracted from each  
596 OD curve the time ( $\tau$ ) required to reach this threshold (Fig1. B). Using the standard curve (Fig.

597 1C) we obtained for each growth condition the fraction of surviving bacteria as a function of  
598 antibiotic treatment time (Fig. 1D).

599 4. *Death rate calculation:* For each condition, we obtained an average survival curve based on  
600 at least 3 biological repeats (for the cAMP data we measured more cAMP levels with less  
601 repeats on each level). We fit the data with a Weibull survival function coupled to exponential  
602 growth,  $e^{\mu t - \eta t^\theta}$ , which allows fitting of exponential and sigmoidal survival curves as well as  
603 allowing for an initial increase in viable cells. For conditions in which the maximum occurred  
604 at 0 hr, we assumed  $\mu = 0$  to ease fitting. To further ease the nonlinear fit, we restricted  $\mu <$   
605 1 (since growth rate without antibiotics are all below 1),  $\eta > 1$  (at least exponential decay),  
606 that the maximum is below 2 and the time to reach the maximum is less than 2 hrs (well  
607 consistent with all data). We define death rate as 1/time for the fit to lose 90% of the  
608 population compared to the initial value at 0 hr. For cultures that grew, we defined a negative  
609 death rate as -1/time for the fit to reach 10x the initial values at 0 hr. Values were averaged  
610 over the number of biological replicates indicated in Figs. S2 and S16, with errors given as the  
611 standard error of the mean.  $R^2$  values for all fits across all biological replicates are provided as  
612 a histogram in Fig. S18. For presentation purposes, additional average survival curves are  
613 shown in Figs. S3 and S17, with additional Weibull plus growth fits. The  $R^2$  values for these fits  
614 are provided as a histogram in Fig. S19.

615 RNA sequencing. Cultures for RNA-seq were grown to exponential phase to OD lower than 0.1 in  
616 microplates, to match the OD at which antibiotic was added to the growing cultures in the death  
617 assay. RNA was extracted from these exponentially growing cultures using RNAeasy Protect bacteria  
618 Mini Kit (Qiagen). Total RNA was measured using Nanodrop (Thermo Scientific). For RNA sequencing  
619 rRNA was depleted using NEBNext rRNA depletion kit. RNAseq libraries were prepared at the Crown  
620 Genomics institute of the Nancy and Stephen Grand Israel National Center for Personalized Medicine,  
621 Weizmann Institute of Science. Libraries were prepared using the INCPM-mRNA-seq without polyA  
622 selection protocol. Briefly, 80 ng of input RNA after ribosomal depletion was used for fragmentation  
623 and generation of double-stranded cDNA. After Agencourt Ampure XP beads cleanup (Beckman  
624 Coulter), end repair, A base addition, adapter ligation and PCR amplification steps were performed.  
625 Libraries were quantified by Qubit (Thermo fisher scientific) and TapeStation (Agilent). Sequencing  
626 was done on a Nextseq instrument (Illumina) using a 75 cycles high output kit. The Reads were  
627 mapped to the MG1655 genome. Expression levels for each gene were quantified using htseq-count.

628 RNA-Seq analysis and clustering. We acquired data for 4229 genes across all measured conditions,  
629 accounting for ~97% of *E. coli* genes. Because we sum gene expression to find sector sizes, we did not  
630 filter out low-read count genes. All raw count data was normalized using DeSeq2 after filtering out  
631 residual rRNA and tRNA reads. The Mclust<sup>61,62</sup> library was used to perform a Gaussian mixture model.  
632 Mclust recommended between 10 and 30 clusters with similar Bayesian Information Criterion (BIC)  
633 and spherical, unequal volume model (“VII”). We used the VII model with 12 clusters. The Spearman  
634 correlation for sugars, NaCl, and TMP conditions was subsequently calculated within each cluster,  
635 categorizing each line in each cluster as correlated, anticorrelated, or unchanging with growth rate. A  
636 liberal p-value cutoff of 0.2 for the correlation was used so as to include all genes as changing  
637 significantly in at least one set of conditions in at least one cluster. Clusters with only unchanging or  
638 positive correlations with growth rate were categorized as R. Clusters not in R and not anticorrelated  
639 with growth rate of the carbon sources were categorized as S. The remaining clusters were  
640 categorized as C, which included to some extent clusters increasing both in poor carbon sources and  
641 in increasing NaCl concentration.

642 Gene Ontology Analysis. Gene lists for each of the three sectors were checked for biological process  
643 gene ontology significance against the full list of *E. coli* genes using the rbioapi interface for PANTHER  
644<sup>63</sup> using default parameters, including a significance cutoff of false discovery rate (FDR) below 0.05.  
645 The full list of GO terms and their significance are provided in Dataset S1. The terms displayed in Fig.  
646 3D are those 5 terms with no significant encompassing terms with the lowest FDR.

647 Nondimensionalization. The underlying equations  $R + C + S = 1$ ,  $\mu = aR - b$ , and  $\rho = \alpha\mu - \beta S + \epsilon$   
648 were converted to glucose-relative Eqs 1-3 in the main text by subtracting off equations  $R_G + C_G +$   
649  $S_G = 1$ ,  $\mu_G = aR_G - b$ , and  $\rho_G = \alpha\mu_G - \beta S_G + \epsilon$  where the G subscript indicates glucose. The deltas  
650 in the main text are defined as, e.g.,  $\Delta\mu = \mu - \mu_G$ . For fitting, a further simplification was made by  
651 non-dimensionalizing. Specifically, we define  $\delta\mu = \frac{\Delta\mu}{\mu_G}$ ,  $\delta\rho = \frac{\Delta\rho}{\rho_G}$ ,  $\delta c = \frac{a}{\mu_G} \Delta C$ ,  $\delta r = \frac{a}{\mu_G} \Delta R$ ,  $\delta s = \frac{a}{\mu_G} \Delta S$ .  
652 This yields non-dimensionalized equations

653 Eq (4)  $\delta r + \delta c + \delta s = 0$

654 Eq (5)  $\delta\mu = \delta r$

655 Eq (6)  $\delta\rho = \hat{\alpha}\delta\mu - \hat{\beta}\delta s$

656 where  $\hat{\alpha} = \alpha \frac{\mu_G}{\rho_G}$  and  $\hat{\beta} = \beta \frac{\mu_G}{a\rho_G}$ .

657 Curve fitting. All fits in the paper were performed in Mathematica using LinearModelFit or  
 658 NonlinearModelFit.

659 For Fig. 3A, Eqs 4-6 were solved for death rate as a function of growth rate at either  $\delta c = 0$   
 660 (stressors) or  $\delta s = 0$  (sugars), eliminated for  $\delta r$ . This yielded the following prediction for death rate:

661 Eq (7) 
$$\delta\rho = \begin{cases} \hat{\alpha}\delta\mu & \text{sugars} \\ (\hat{\alpha} + \hat{\beta})\delta\mu & \text{stressors} \end{cases}$$

662 Data was organized as 3-value points (type index, growth rate, death rate), with the index specifying  
 663 the data point as sugar, NaCl, or TMP. These data were non-dimensionalized using the measured  
 664 values for glucose and fit to Eq. 7. Fitting weights were given as the inverse of the sum-square error  
 665 of growth and death rates, with growth and death errors normalized first across all samples. Glucose  
 666 was included as both a sugar, NaCl, and TMP, with 1/3-weight each. Because we assume measured  
 667 values for the growth and death rates on glucose, there are two sources of error on the fit. The first  
 668 derives from the fitting error when glucose values are given and the second derives from the variation

669 in the glucose measurements themselves. We thus calculate error bands for fits as  $\sqrt{CI_{(G)}^2 + CI_{G_{boot}}^2}$ .

670 Here  $CI_{(G)}$  is defined as the 90% confidence interval of the fit with glucose specified as the average  
 671 glucose measurements.  $CI_{G_{boot}}$  is defined as the 90% confidence interval across 1000 fits, where for  
 672 each fit the glucose growth and death rates were sampled from a Normal distribution with mean and  
 673 standard deviation given by the measured average and standard error of glucose displayed in Fig. 2.  
 674 The same procedure was followed in Figs. 3D-F, 4A, and 4B (low cAMP). Error bands for Figs. 3B and  
 675 4B (high cAMP) were produced using the same procedure where already fit parameters were likewise  
 676 included in the bootstrapping.

677 For Fig. 3B, we assumed that growth-derived death  $\alpha = \alpha_0(m - m_G)$  and glucose death rate  
 678  $\rho_G = \rho_0(m - m_G)$  increased linearly with antibiotic concentration  $m$ , relative to a reference  $m_G$ .  
 679 Given that  $m$  equals the MIC when  $\rho = 0$  for any condition, we immediately see that  $m_G$  is the MIC  
 680 on glucose. Substituting these relations into Eq. 7 yields the following prediction for the MIC ( $m$ ) for  
 681 all conditions when setting  $\rho = 0$ :

682 Eq (8) 
$$\delta m = \begin{cases} 0 & \text{sugars} \\ \hat{\beta}\delta m_{10} \frac{\delta\mu}{1+\hat{\alpha}\delta\mu} & \text{stressors} \end{cases}$$

683 with  $\delta m = \frac{m-m_G}{m_G}$  and  $\delta m_{10} = \frac{10-m_G}{m_G}$  comes from the fact that  $\alpha_0 = \frac{10-m_G}{m_G}$ , the value 10 being the

684 antibiotic concentration used in fitting the values of alpha and beta in Fig. 3A. Note that the  
685 constant value in sugars is not assumed upfront, but rather derives from the assumption that  $\Delta S =$   
686 0 in sugars.

687 For Fig. 3E, a separate fit was performed for sugars, NaCl, and TMP. In each case, the data  
688 were fit to the expected piecewise linear function implied by Eq. 2:

689 
$$\Delta R = \frac{\Delta\mu}{a}$$
  
690 Eq (9) 
$$\Delta S = 0$$
 sugars

691 
$$\Delta C = -\frac{\Delta\mu}{a}$$

692

693 
$$\Delta R = \frac{\Delta\mu}{a}$$
  
694 Eq (10) 
$$\Delta S = -\frac{\Delta\mu}{a}$$
 stressors

695 
$$\Delta C = 0$$

696 These equations have three free parameters,  $C_G$ ,  $S_G$ , and  $a$ , where the glucose growth rate reference  
697 is taken as given from the data as described above for the fit in Fig. 3A.

698 For the relationship between total RNA and growth rate, we fit

699 Eq (11) 
$$\frac{r_{tot}}{r_{tot,G}} = a_{totRNA} \frac{\mu}{\mu_G},$$

700 where  $r_{tot}$  is the total RNA,  $r_{tot,G}$  the total RNA in glucose growth,  $\mu$  the growth rate,  $\mu_G$  the growth  
701 rate on glucose, and  $a_{totRNA}$  the fitted slope. We performed the fit for sugar, NaCl, and TMP  
702 conditions separately, as well as with all data combined.

703 For Fig. 4A, the same procedure was used as in Fig. 3A, but a separate anchor was used for  
704 low cAMP data (0.2mM cAMP) and high cAMP data (0.3mM cAMP), as described in the main text,  
705 with new parameters  $\hat{\alpha}$  and  $\hat{\beta}$ :

706 Eq (12) 
$$\delta\rho = \begin{cases} \hat{\alpha}\delta\mu & \text{cAMP} \geq 0.3\text{mM} \\ (\hat{\alpha} + \hat{\beta})\delta\mu & \text{cAMP} \leq 0.2\text{mM} \end{cases}$$

707 For Fig. 4B,  $m_G$  was estimated directly as the average of MIC values for measured points at cAMP >  
708 0.4mM. A separate, extrapolated anchor point (“pseudoglucose” growth rate  $\mu_{PG}$ ) was fit for to the

709 low cAMP data using Eq 8, with  $\delta m_{10}$  replaced with  $\delta m_{15} = \frac{15-m_G}{m_G}$ , the value 15 being the  
710 concentration of nalidixic acid used in Fig. 4A:

711 Eq (13) 
$$\delta m = \begin{cases} 0 & \text{cAMP} \geq 0.3 \\ \hat{\beta} \delta m_{15} \frac{\delta \mu}{1 + \hat{\alpha} \delta \mu} & \text{cAMP} \leq 0.2 \end{cases}$$

712

### 713 **Code availability**

714 RNA-Seq analysis was performed in R version 4.1.0. All other fitting and analytical manipulation were  
715 performed in Mathematica version 13. Source code can be found in Dataset S2.

716

### 717 **Data availability**

718 All data not provided in the text or supplements is available upon request.

719

### 720 **Acknowledgements**

721 We thank B. Towbin, S. Kostinski, T. Milo, A. Bar, Y. Yang, and E. Vaisbourd for comments on the  
722 manuscript. Funding was provided by European Research Council (ERC) under the European  
723 Union's Horizon 2020 research and innovation program (grant agreement No. 856587). D.S.G. was  
724 funded as a member of the Zuckerman Postdoctoral Scholars Program. U.A is the incumbent of the  
725 Abisch-Frenkel Professional Chair.

726

### 727 **Author contributions**

728 A.B. conducted experiments and analysis. A.M. and D.S.G. performed theoretical analysis and fits.  
729 All authors contributed to conception and to writing of the manuscript.

730

### 731 **Competing interests**

732 The authors declare no competing interests.

733

### 734 **Supplementary information**



735 Supplementary Figs. S1-S11 and Tables S1-S2 are provided in the supplementary information.

736
